# Supplementary material for: Groundwater nitrate concentration evolution under climate change and agricultural adaptation scenarios: Prince Edward Island, Canada
Source: Copernicus journal article supplement (doi:10.5194/esd-7-183-2016), 2016-03-09
Supplement: Supplementary file 1 [file esd-7-183-2016-supplement.pdf]

Supplement of Earth Syst. Dynam., 7, 183–202, 2016  
<http://www.earth-syst-dynam.net/7/183/2016/>  
doi:10.5194/esd-7-183-2016-supplement  
© Author(s) 2016. CC Attribution 3.0 License.

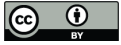

*Supplement of*

## **Groundwater nitrate concentration evolution under climate change and agricultural adaptation scenarios: Prince Edward Island, Canada**

**Daniel Paradis et al.**

*Correspondence to:* Daniel Paradis ([daniel.paradis@canada.ca](mailto:daniel.paradis@canada.ca))

The copyright of individual parts of the supplement might differ from the CC-BY 3.0 licence.

This supplemental material provides:

- Table S1. Classification of nitrate concentrations for each watershed and percentage change compared to 2001 (%/2001) in average nitrate concentration for the entire Prince Edward Island for scenarios 1 to 9. B is for Background, L, M and H stand for Low, Medium and High nitrate concentration class, respectively. Locations of each watershed with associated watershed number are indicated in Figure 1.
- Table S2. Temperature and precipitation changes for the future period (2040–2069) relative to the historical period (1971–2000) for each selected climate change scenarios at the Charlottetown weather station, Prince Edward Island, based on up-to-date climate simulations.

Table S1. Classification of nitrate concentrations for each watershed and percentage change compared to 2001 (%/2001) in average nitrate concentration for the entire Prince Edward Island for scenarios 1 to 9. B is for Background, L, M and H stand for Low, Medium and High nitrate concentration class, respectively. Locations of each watershed with associated watershed number are indicated in Figure 1.

| Watershed Name<br>(Number)      | Climate |                   |                                |                                |                                     |                                 | Climate and Agricultural Adaptation |                                |                                     |                                 |
|---------------------------------|---------|-------------------|--------------------------------|--------------------------------|-------------------------------------|---------------------------------|-------------------------------------|--------------------------------|-------------------------------------|---------------------------------|
|                                 | 2001    | Baseline<br>2050  | Climate                        |                                | Climate and Agricultural Adaptation |                                 | Climate                             |                                | Climate and Agricultural Adaptation |                                 |
|                                 | Class   | Class<br>(%/2001) | CGCM2- A2<br>Class<br>(%/2001) | CGCM2- B2<br>Class<br>(%/2001) | HadCM3- A2<br>Class<br>(%/2001)     | HadCM3- B2<br>Class<br>(%/2001) | CGCM2- A2<br>Class<br>(%/2001)      | CGCM2- B2<br>Class<br>(%/2001) | HadCM3- A2<br>Class<br>(%/2001)     | HadCM3- B2<br>Class<br>(%/2001) |
| Sea Cow Pond (1)                | M       | M (17)            | M (18)                         | M (18)                         | M (18)                              | M (18)                          | H (33)                              | H (33)                         | H (36)                              | M (23)                          |
| Cape Gage (2)                   | L       | M (27)            | M (27)                         | M (27)                         | M (27)                              | M (31)                          | M (45)                              | M (45)                         | M (45)                              | M (45)                          |
| Tignish River (3)               | M       | M (15)            | M (15)                         | M (15)                         | M (15)                              | M (19)                          | M (35)                              | M (31)                         | M (35)                              | M (38)                          |
| Little Miminegash River (4)     | L       | M (19)            | M (20)                         | M (20)                         | M (20)                              | M (20)                          | M (38)                              | M (38)                         | M (38)                              | M (38)                          |
| Hills River (5)                 | M       | M (15)            | M (15)                         | M (15)                         | M (15)                              | M (15)                          | H (34)                              | H (34)                         | H (34)                              | M (32)                          |
| Whites Cove (6)                 | L       | L (25)            | L (24)                         | L (29)                         | L (24)                              | L (24)                          | M (43)                              | M (43)                         | M (43)                              | L (38)                          |
| Mill River (7)                  | M       | M (18)            | M (19)                         | M (19)                         | M (19)                              | M (19)                          | M (37)                              | M (37)                         | M (37)                              | M (37)                          |
| Trout River (Roxbury) (8)       | M       | M (14)            | M (15)                         | M (13)                         | M (15)                              | M (13)                          | M (33)                              | M (30)                         | M (33)                              | M (30)                          |
| Little Pierre Jacques River (9) | L       | M (23)            | M (24)                         | M (24)                         | M (24)                              | M (24)                          | M (40)                              | M (40)                         | M (40)                              | M (40)                          |
| Brae River (10)                 | M       | M (23)            | M (22)                         | M (22)                         | M (25)                              | M (28)                          | M (39)                              | M (39)                         | M (42)                              | M (42)                          |
| Enmore River (11)               | B       | L (11)            | L (11)                         | L (11)                         | L (11)                              | L (21)                          | L (31)                              | L (31)                         | L (31)                              | L (31)                          |
| Cranberry Point (12)            | B       | L (10)            | L (16)                         | L (16)                         | L (16)                              | L (16)                          | L (37)                              | L (26)                         | L (37)                              | L (37)                          |
| St. Phillip (13)                | B       | L (12)            | L (14)                         | L (14)                         | L (14)                              | L (14)                          | L (25)                              | L (25)                         | L (25)                              | L (35)                          |
| Browns Creek (14)               | L       | L (6)             | L (23)                         | L (14)                         | L (23)                              | L (19)                          | M (44)                              | M (36)                         | M (44)                              | M (36)                          |
| Little Trout River (15)         | L       | M (16)            | M (31)                         | M (24)                         | M (31)                              | M (24)                          | M (54)                              | M (46)                         | M (54)                              | M (42)                          |
| Haldiman River (16)             | L       | L (12)            | L (12)                         | L (12)                         | L (12)                              | L (12)                          | L (31)                              | L (31)                         | L (31)                              | L (31)                          |
| Sunbury Cove (17)               | L       | L (26)            | M (44)                         | M (35)                         | M (44)                              | M (35)                          | M (62)                              | M (53)                         | M (62)                              | M (53)                          |
| Rainers Creek (18)              | H       | H (21)            | H (40)                         | H (31)                         | H (40)                              | H (33)                          | H (59)                              | H (50)                         | H (59)                              | H (50)                          |
| Baltic River (19)               | M       | H (21)            | H (39)                         | H (31)                         | H (39)                              | H (24)                          | H (57)                              | H (49)                         | H (57)                              | H (41)                          |
| Mackies Pond (20)               | M       | H (20)            | H (37)                         | H (29)                         | H (37)                              | H (31)                          | H (55)                              | H (47)                         | H (55)                              | H (45)                          |
| Grahams Crek (21)               | L       | L (1)             | L (14)                         | M (8)                          | M (14)                              | M (11)                          | M (25)                              | M (18)                         | M (25)                              | M (21)                          |
| Schurman's Point (22)           | H       | H (22)            | H (39)                         | H (31)                         | H (41)                              | H (41)                          | H (59)                              | H (49)                         | H (59)                              | H (47)                          |
| Dunk River (23)                 | M       | H (35)            | H (55)                         | H (46)                         | H (55)                              | H (46)                          | H (76)                              | H (65)                         | H (74)                              | H (63)                          |
| Prevost Cove (24)               | M       | H (29)            | H (45)                         | H (38)                         | H (47)                              | H (29)                          | H (65)                              | H (56)                         | H (65)                              | H (45)                          |
| McPhee Creek (25)               | M       | M (-18)           | M (-16)                        | M (-18)                        | M (-16)                             | M (-16)                         | M (-9)                              | M (-13)                        | M (-9)                              | M (-11)                         |
| Hunter River (26)               | M       | M (1)             | M (5)                          | M (-1)                         | M (5)                               | M (5)                           | M (15)                              | M (8)                          | M (15)                              | M (15)                          |
| Cymbria (27)                    | M       | M (4)             | M (3)                          | M (-6)                         | M (3)                               | M (3)                           | M (12)                              | M (3)                          | M (12)                              | M (12)                          |
| North River (28)                | M       | M (10)            | M (8)                          | M (2)                          | M (8)                               | M (8)                           | M (18)                              | M (10)                         | M (18)                              | M (15)                          |
| Hyde Creek (29)                 | M       | M (1)             | M (2)                          | M (-5)                         | M (2)                               | M (2)                           | H (10)                              | M (2)                          | H (10)                              | H (8)                           |
| Long Creek (30)                 | H       | M (-30)           | M (-31)                        | M (-33)                        | M (-29)                             | M (-24)                         | M (-23)                             | M (-28)                        | M (-23)                             | M (-21)                         |
| Winter River (31)               | M       | M (15)            | M (12)                         | M (2)                          | M (12)                              | M (12)                          | M (24)                              | M (15)                         | M (24)                              | M (24)                          |
| Appletree Creek (32)            | L       | L (16)            | L (13)                         | L (1)                          | L (13)                              | L (13)                          | M (30)                              | L (18)                         | M (26)                              | M (26)                          |

|                                       |   |         |         |         |         |         |        |         |        |        |
|---------------------------------------|---|---------|---------|---------|---------|---------|--------|---------|--------|--------|
| Feehans Shore (33)                    | L | L (15)  | L (7)   | L (-7)  | L (7)   | L (13)  | L (20) | L (7)   | L (20) | L (27) |
| St.Peters Harbour (34)                | L | L (11)  | L (7)   | L (-4)  | L (7)   | L (7)   | L (24) | L (7)   | L (18) | L (24) |
| Morell River (35)                     | L | L (10)  | L (13)  | L (3)   | L (13)  | L (13)  | L (24) | L (8)   | L (24) | L (29) |
| Orwell Cove (36)                      | L | L (12)  | L (8)   | L (0)   | L (8)   | L (12)  | M (24) | L (12)  | M (24) | M (24) |
| Little Sands Shore (37)               | L | L (-6)  | L (-4)  | L (-13) | L (-4)  | L (-4)  | L (5)  | L (-4)  | L (5)  | L (5)  |
| Nicolle Point (38)                    | L | L (-15) | L (-11) | L (-16) | L (-11) | L (-7)  | L (-3) | L (-11) | L (-3) | L (1)  |
| Albion (39)                           | L | L (8)   | L (9)   | L (-2)  | L (9)   | L (15)  | L (21) | L (9)   | L (21) | L (26) |
| Montague-Valleyfield (40)             | L | L (-20) | L (-15) | L (-22) | L (-15) | L (-12) | L (-9) | L (-19) | L (-9) | L (-5) |
| Brudenell River (41)                  | L | L (9)   | L (9)   | L (3)   | L (9)   | L (14)  | L (19) | L (9)   | L (25) | L (30) |
| Narrows Creek (42)                    | L | L (12)  | L (23)  | L (9)   | L (23)  | L (14)  | M (36) | L (23)  | M (36) | L (27) |
| Marie River (43)                      | L | L (5)   | L (7)   | L (1)   | L (7)   | L (12)  | L (18) | L (7)   | L (18) | L (24) |
| Poplar Point (44)                     | L | L (7)   | L (8)   | L (-3)  | L (8)   | L (13)  | L (24) | L (8)   | L (24) | L (24) |
| Shipwreck Point (45)                  | L | L (13)  | L (14)  | L (4)   | L (14)  | L (20)  | L (30) | L (14)  | L (30) | L (35) |
| St.Margarets Shore (46)               | L | L (14)  | L (13)  | L (3)   | L (13)  | L (18)  | L (28) | L (13)  | L (28) | L (33) |
| Surveyor Point (47)                   | L | L (15)  | L (13)  | L (2)   | L (13)  | L (19)  | L (29) | L (13)  | L (29) | L (35) |
| MacKinnon Point (48)                  | L | L (18)  | L (19)  | L (9)   | L (19)  | L (19)  | L (36) | L (19)  | L (36) | L (30) |
| Bradshaw River (49)                   | H | H (21)  | H (38)  | H (31)  | H (38)  | H (23)  | H (57) | H (57)  | H (58) | H (40) |
| Victoria (50)                         | M | H (7)   | H (23)  | H (15)  | H (23)  | H (17)  | H (40) | H (31)  | H (40) | H (29) |
| %/2001 Average Concentration over PEI | - | 11      | 17      | 11      | 17      | 15      | 32     | 25      | 32     | 29     |

Table S2. Temperature and precipitation changes for the future period (2040–2069) relative to the historical period (1971–2000) for each selected climate change scenarios at the Charlottetown weather station, Prince Edward Island, based on up-to-date climate simulations.

| Scenario       | Temperature change        |      |                           |      | Precipitation change |      |                             |       |
|----------------|---------------------------|------|---------------------------|------|----------------------|------|-----------------------------|-------|
|                | Monthly Mean Maximum (°C) |      | Monthly Mean Minimum (°C) |      | Monthly Total (%)    |      | Days with Precipitation (%) |       |
|                | Jan.                      | July | Jan.                      | July | Jan.                 | July | Jan.                        | July  |
| CanESM2-RCP8.5 | 3.7                       | 4.9  | 4.4                       | 4.6  | 3.5                  | 21.1 | -7.8                        | -3.7  |
| CanESM2-RCP4.5 | 3.3                       | 3.6  | 4.2                       | 3.5  | 1.1                  | 29.5 | -8.3                        | 0.8   |
| HadGEM2-RCP8.5 | 4.0                       | 5.1  | 5.5                       | 5.1  | 15.5                 | 22.7 | -5.3                        | -19.7 |
| HadGEM2-RCP4.5 | 3.7                       | 3.5  | 4.8                       | 3.6  | 8.8                  | 21.0 | -4.6                        | -3.0  |
